# Supplementary material for: The exostosin family of glycosyltransferases: mRNA expression profiles and heparan sulphate structure in human breast carcinoma cell lines
Source: PubMed Central journal article supplement (PMC6117623; doi:10.1042/bsr20180770), 2018-08-31
Supplement: bsr20180770_Supp1.pdf [file bsr20180770_Supp1.pdf]

## Supplemental Table S1. Primer sequences

| Human  | Forward (5'-3')        | Primer position | Reverse (5'-3')         | Primer position | Amplicon bp | Sequence ID    |
|--------|------------------------|-----------------|-------------------------|-----------------|-------------|----------------|
| EXT1   | GCTCTTGCTCGCCCTTTTGT   | 814-834         | GTGGTGCAAGCCATTCCTAC    | 917-898         | 104         | NM 000127.2    |
| EXT2   | AAGCACCAGGTCTTCGATTACC | 1059-1080       | GAAGTACGCTCCCAGAACC     | 1355-1336       | 297         | NM 000401.3    |
| EXTL1  | TCCGAGGTCATCGACTGGAC   | 1789-1808       | AGGAGAAGTAGGCATCCATA    | 1936-1916       | 148         | NM 004455.2    |
| EXTL2  | ACAGGATGAGAAATCGACTCCA | 1040-1061       | CTGATGAAGTAGAGACGTGCTTT | 1216-1194       | 177         | NM 001439.3    |
| EXTL3  | CGCTCATCGCCCACTATTACC  | 887-907         | TGTCAGCTCTGGCGCTT       | 1069-1051       | 183         | NM 001440.3    |
| HPRT1  | CTTCCTCCTCTGAGCAGTC    | 123-142         | TCGAGCAAGACGTTTCAGTCC   | 320-301         | 198         | NM 000194.2    |
| POLR2F | CCCGAAAGATCCCCATCAT    | 519-537         | CACCCCCAGTCTTCATAGC     | 583-564         | 65          | NM 001301129.1 |

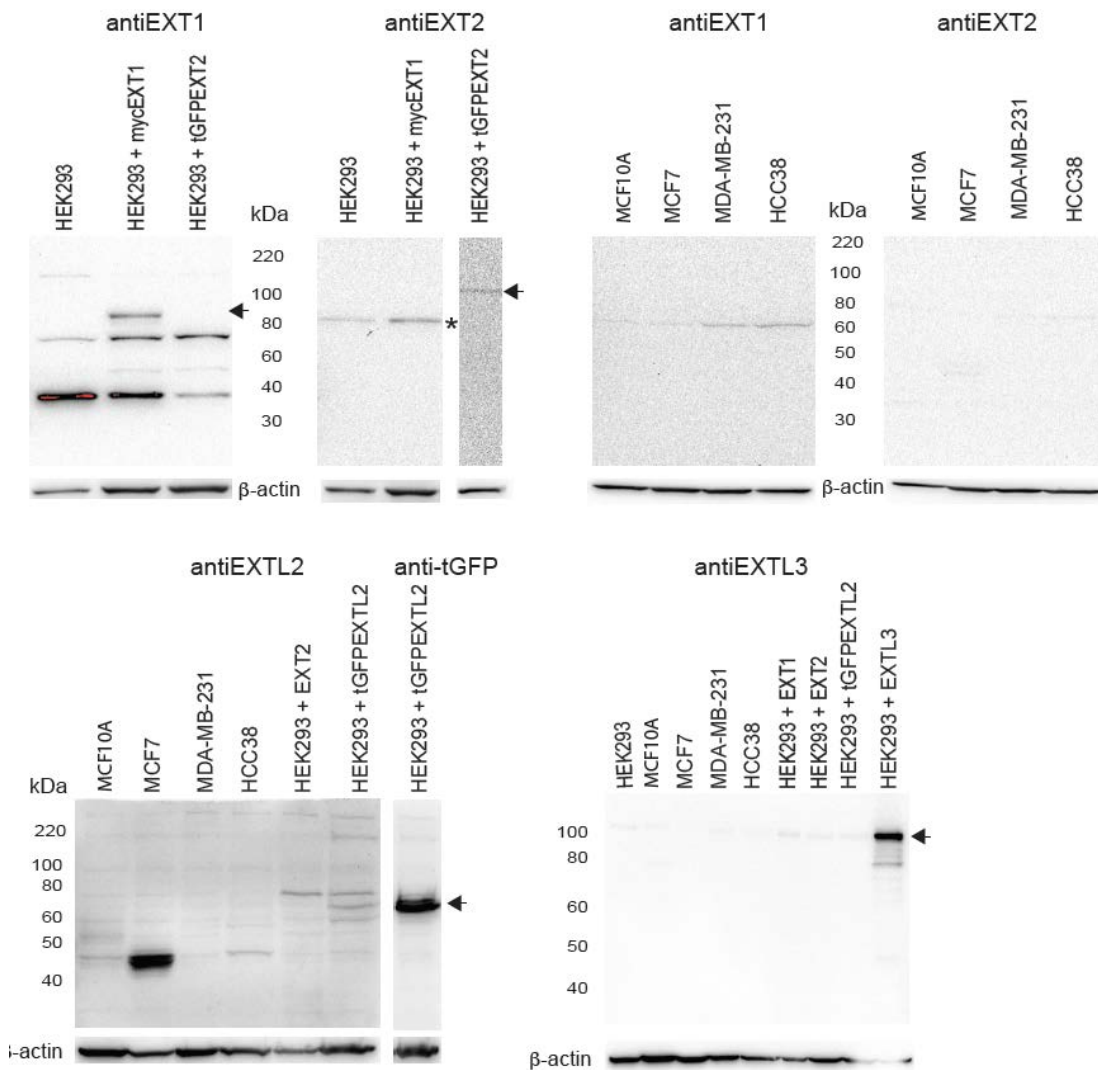

### Supplementary figure 1. EXT/L protein expression

Representative immunoblots performed at least three times on cell lysates using the antibodies indicated above the blots. Proteins, approx. 40  $\mu$ g, were separated on 10% SDS-polyacrylamide gels followed by transfer of proteins to nitrocellulose membranes and immunoblotting with the indicated antibodies. The following EXT antibodies were used; EXT1 (1:1000, mouse monoclonal #sc-515144, Santa Cruz Biotechnology); EXT2 (1:1000, mouse monoclonal #sc-514092, Santa Cruz Biotechnology); EXTL2 (1:1000, rabbit polyclonal #SAB1410351, Sigma-Aldrich) and EXTL3 (1:1000, goat polyclonal #AF2635, R&D-systems). Peroxidase-conjugated secondary goat anti-mouse and goat-anti rabbit IgG were from Santa Cruz Biotechnology. For positive controls EXT-overexpressing cells tagged with turboGFP (tGFP) or myc were used. Myc and tGFP tagged EXT-proteins were detected with anti-myc (1:1000, #087M4765v mouse monoclonal, Sigma-Aldrich) and anti-tGFP (1:1000, #TA150041 mouse monoclonal, ORIGENE), respectively.  $\beta$ -Actin (1:5000, mouse monoclonal #A5441) was from, Sigma-Aldrich. Blots were developed using ECL reagent (Pierce) and the bands visualized with a ChemiDoc XRS imaging system (Bio-Rad).

Note! The star denotes the unspecific 70-75 kDa band in the anti-EXT1 blot was also present in EXT1 deficient cells (data not shown). The arrowheads denote the EXT band.
